# Supplementary material for: Two replication fork remodeling pathways generate nuclease substrates for distinct fork protection factors
Source: PubMed Central journal article supplement — Sci Adv. 2020 Nov 13;6(46):eabc3598. doi: 10.1126/sciadv.abc3598 (PMC7673757; doi:10.1126/sciadv.abc3598), 2020-11-13
Supplement: abc3598_SM.pdf [file abc3598_SM.pdf]

## Supplementary Materials for

### **Two replication fork remodeling pathways generate nuclease substrates for distinct fork protection factors**

W. Liu, A. Krishnamoorthy, R. Zhao, D. Cortez\*

\*Corresponding author. Email: [david.cortez@vanderbilt.edu](mailto:david.cortez@vanderbilt.edu)

Published 13 November 2020, *Sci. Adv.* **6**, eabc3598 (2020)  
DOI: [10.1126/sciadv.abc3598](https://doi.org/10.1126/sciadv.abc3598)

#### **This PDF file includes:**

Figs. S1 to S8  
Tables S1 and S2

## Supplementary Materials

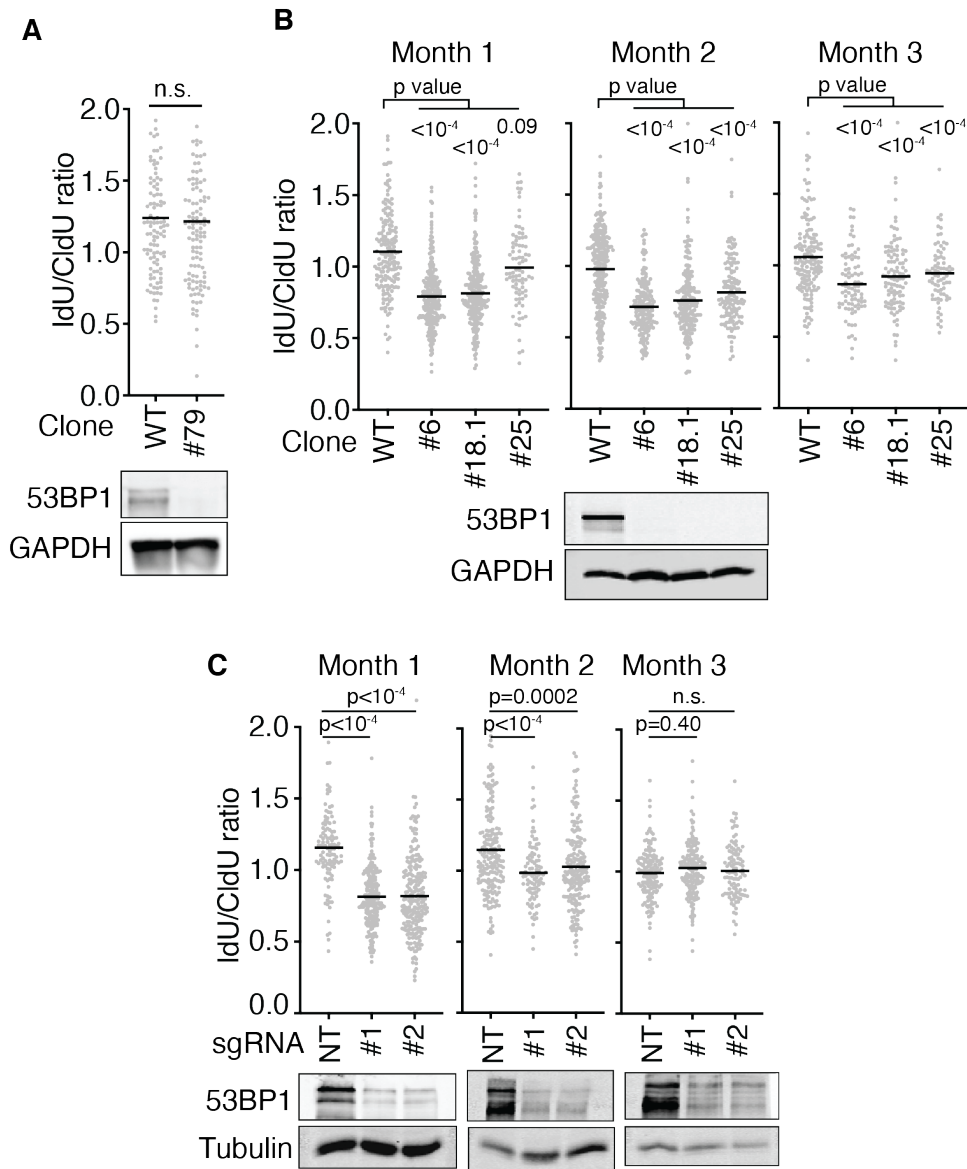

**Fig. S1. 53BP1 protects replication forks from nascent strand degradation in U2OS cells.** Fork protection assays were completed as in Fig. 1. **(A)** 53BP1 knockout clone #79 obtained from Dr. Nima Mosammaparast was compared to parental U2OS cells. **(B)** U2OS 53BP1 knockout clones were isolated, verified by immunoblotting at first month, and examined for fork protection in the first, second, or third month after clonal cell lines were isolated. **(C)** Cas9 mRNA and sgRNAs targeting 53BP1 or non-targeting (NT) sgRNA were co-transfected into U2OS cells. Fork protection was analyzed in the first, second, and third months after transfection. A 53BP1 immunoblot was performed each month to measure 53BP1 expression levels.

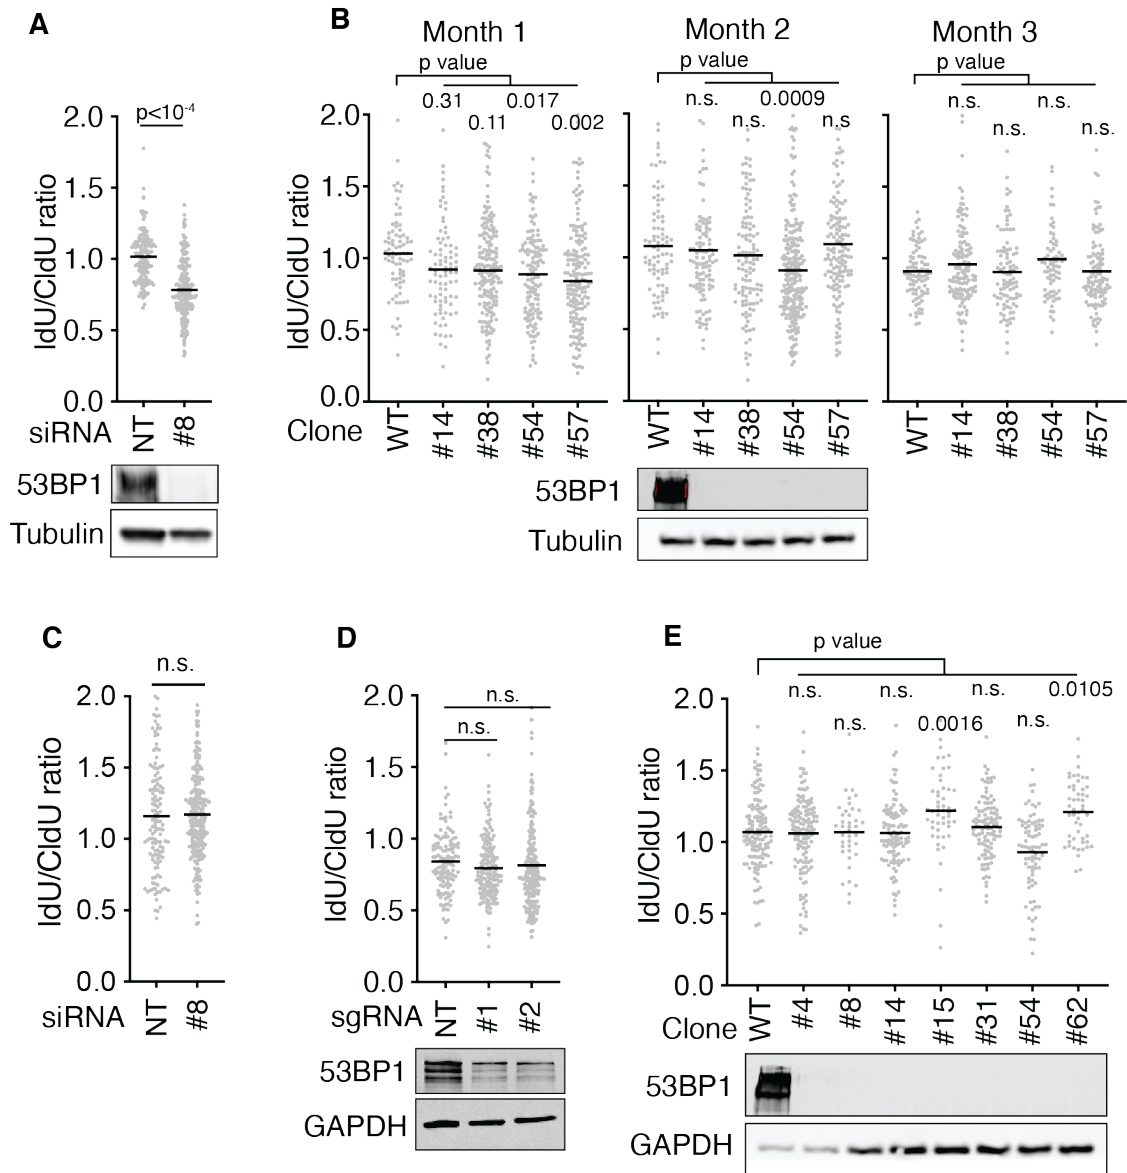

**Fig. S2. 53BP1 mediated fork protection is cell type specific.** (A) HEK293T cells transfected with non-targeting (NT) or 53BP1 siRNA were analyzed for fork protection and 53BP1 expression. (B) Four CRISPR-Cas9 generated 53BP1-deficient HEK293T cell lines were analyzed in the first, second, and third month after isolation for fork protection. Immunoblotting was performed in the first month. (C) hTERT-RPE1 cells transfected with the non-targeting and 53BP1 siRNA before analysis for fork protection and immunoblotting. (D) hTERT-RPE1 cells transfected with Cas9 expression vector and sgRNAs targeting 53BP1 or non-targeting sgRNA and analyzed for fork protection and 53BP1 expression. (E) hTERT-RPE1 53BP1 knockout cell clones were isolated and examined for fork protection and 53BP1 expression.

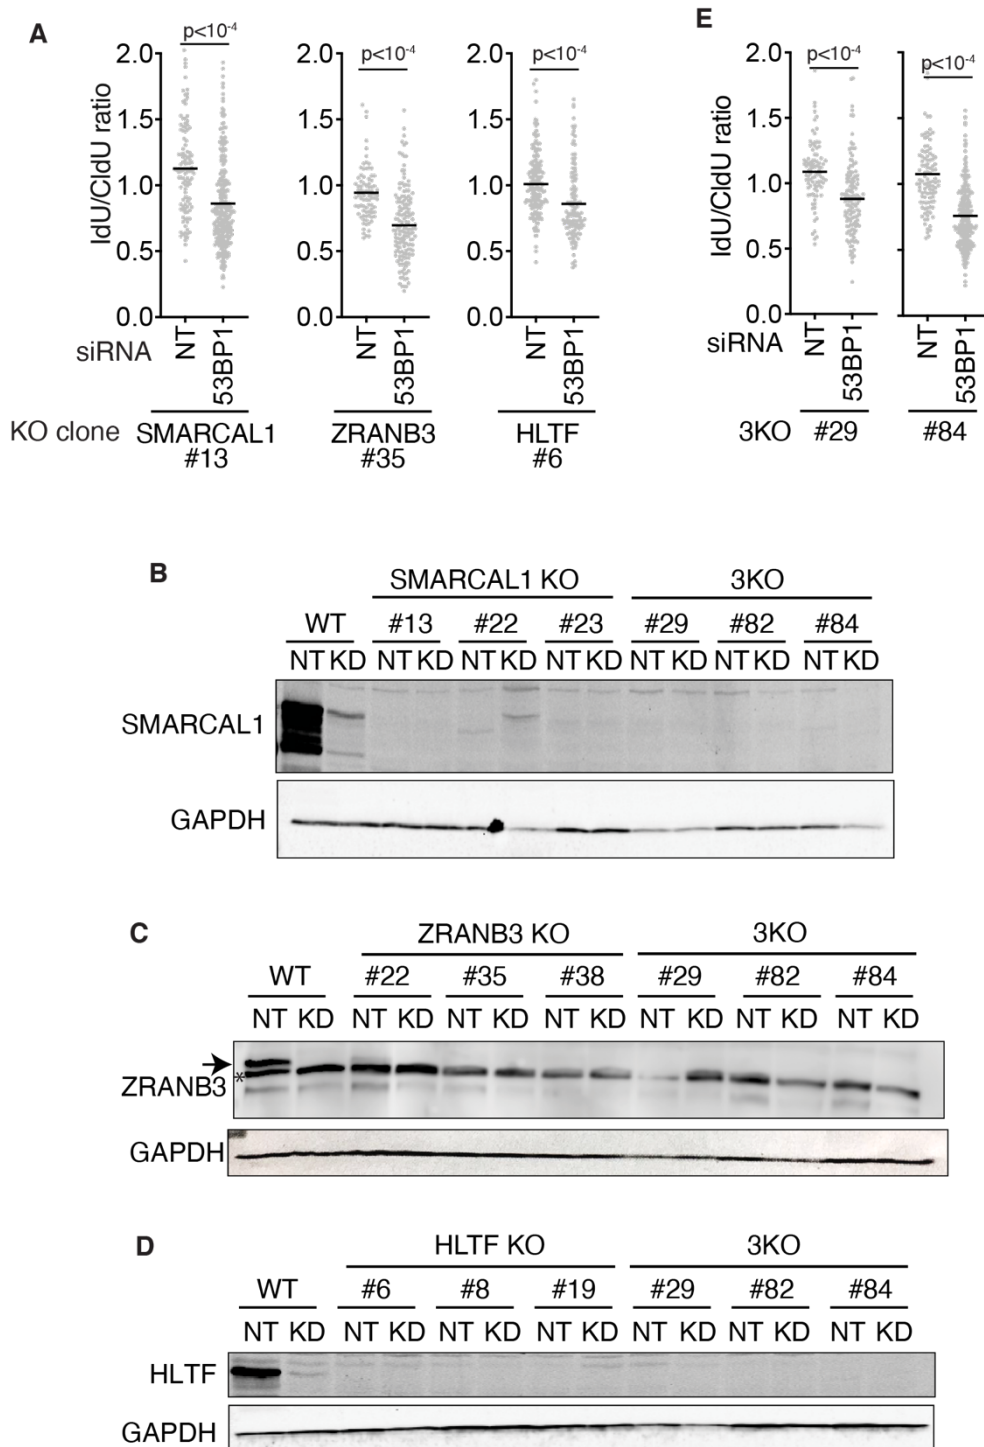

**Fig. S3. SMARCAL1, ZRANB3, and HLTF are not required for nascent strand degradation in 53BP1-deficient U2OS cells.** (A) SMARCAL1, ZRANB3 and HLTF single knockout U2OS clones were transfected with 53BP1 siRNA prior to performing the fork protection assay. (B-D) Immunoblots for SMARCAL1, ZRANB3 and HLTF single knockout and triple knockout (3KO) U2OS clones. Cells were transfected with non-targeting (NT) or SMARCAL1, ZRANB3, or HLTF siRNAs (KD) to confirm the knockouts did not retain protein expression and as a control for antibody specificity. The \* in the ZRANB3 blot indicates a protein that cross-reacts with the ZRANB3 antibody. (E) 3KO U2OS clones were transfected with 53BP1 siRNA prior to performing the fork protection assay.

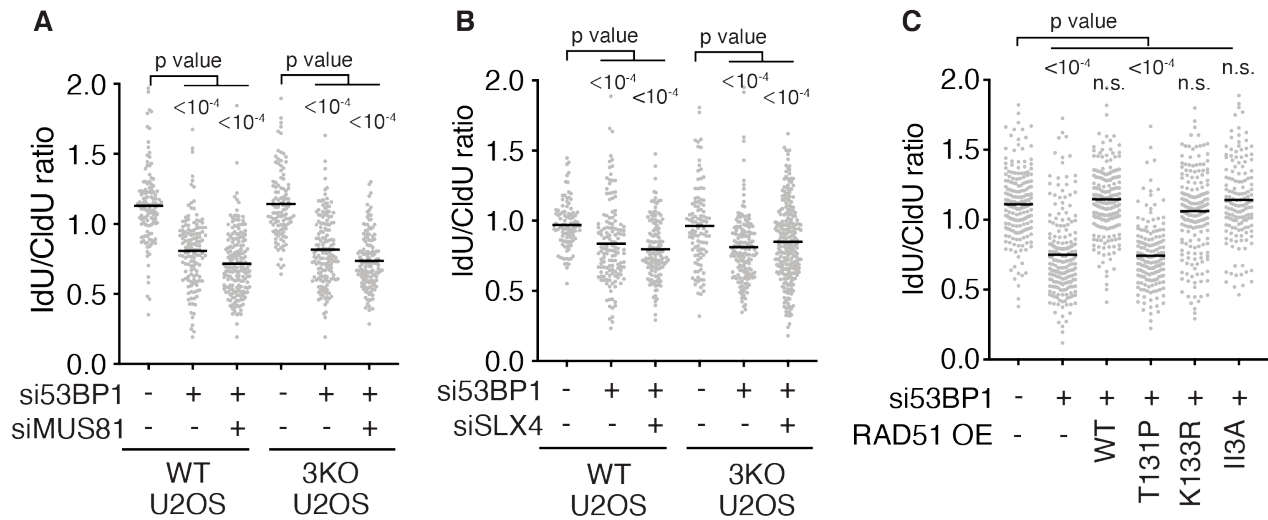

**Fig. S4. SLX4 and MUS81 is not required for fork degradation in the absence of 53BP1, and RAD51 overexpression prevents degradation. (A-B)** Wild-type (WT) or SMARCAL1, ZRANB3, and HLTf triple knockout (3KO) U2OS cells were transfected with the indicated siRNAs prior to analyzing fork protection. **(C)** U2OS cells transfected with 53BP1 or non-targeting siRNA and expression vectors encoding the indicated RAD51 wild type (WT) or mutant proteins were analyzed for fork protection.

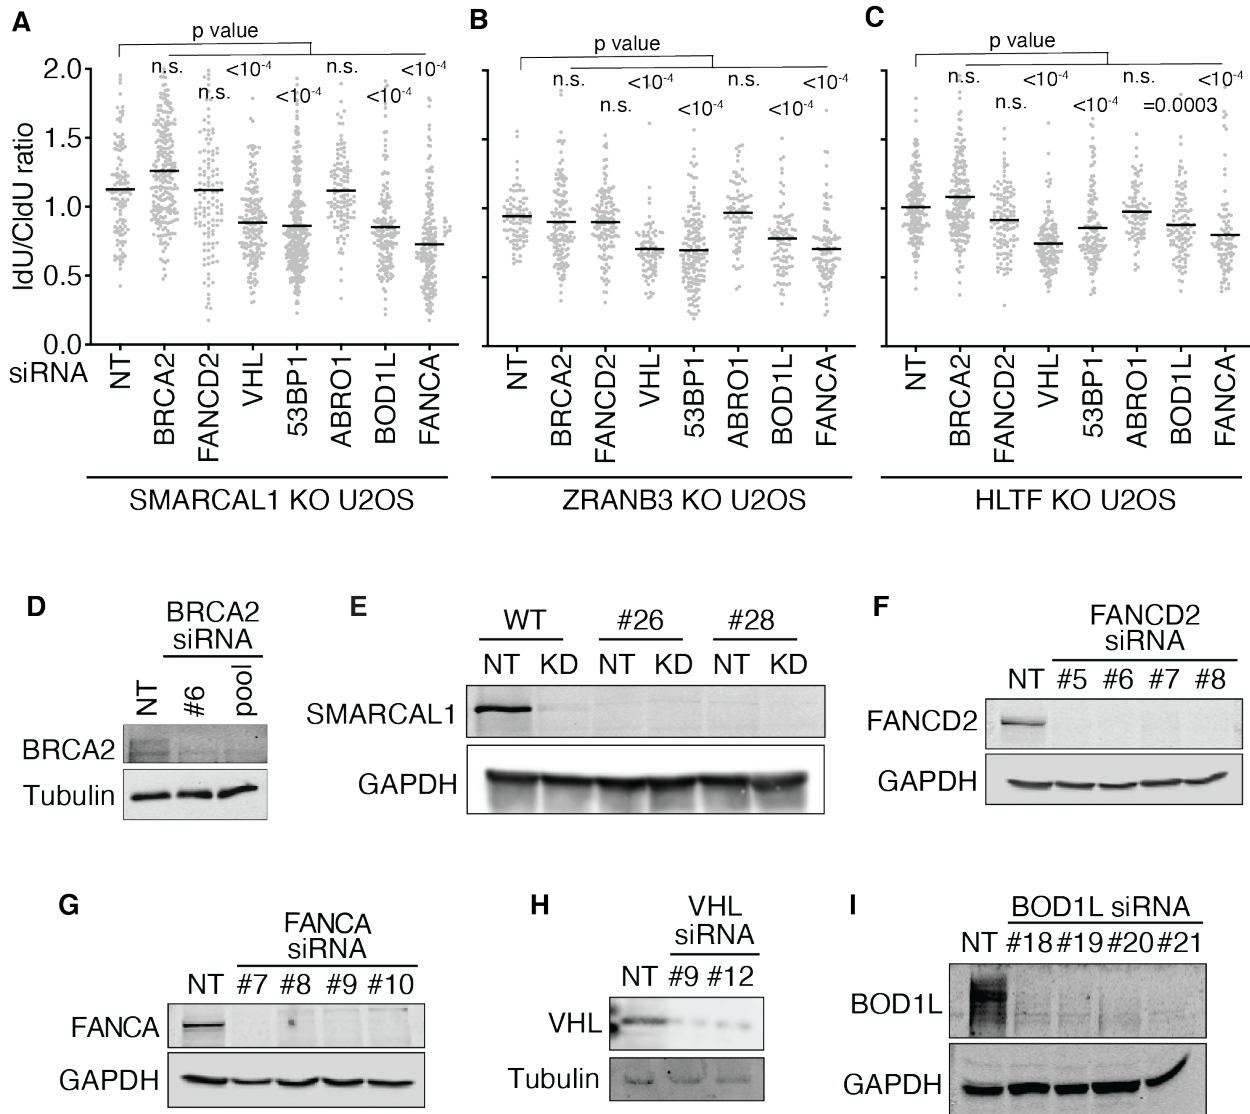

**Fig. S5. SMARCAL1, ZRANB3, and HLTF are not required to generate the fork resection substrate in 53BP1, BOD1L, VHL, or FANCA-deficient cells.** siRNAs to the indicated genes were transfected into **(A)** SMARCAL1, **(B)** ZRANB3, or **(C)** HLTF knockout U2OS cells prior to performing the fork protection assay. **(D-H)** Immunoblots were performed after transfection with the indicated siRNAs in U2OS cells to test knockdown efficiency. SMARCAL1 knockout clones were also examined for expression in panel **(E)**.

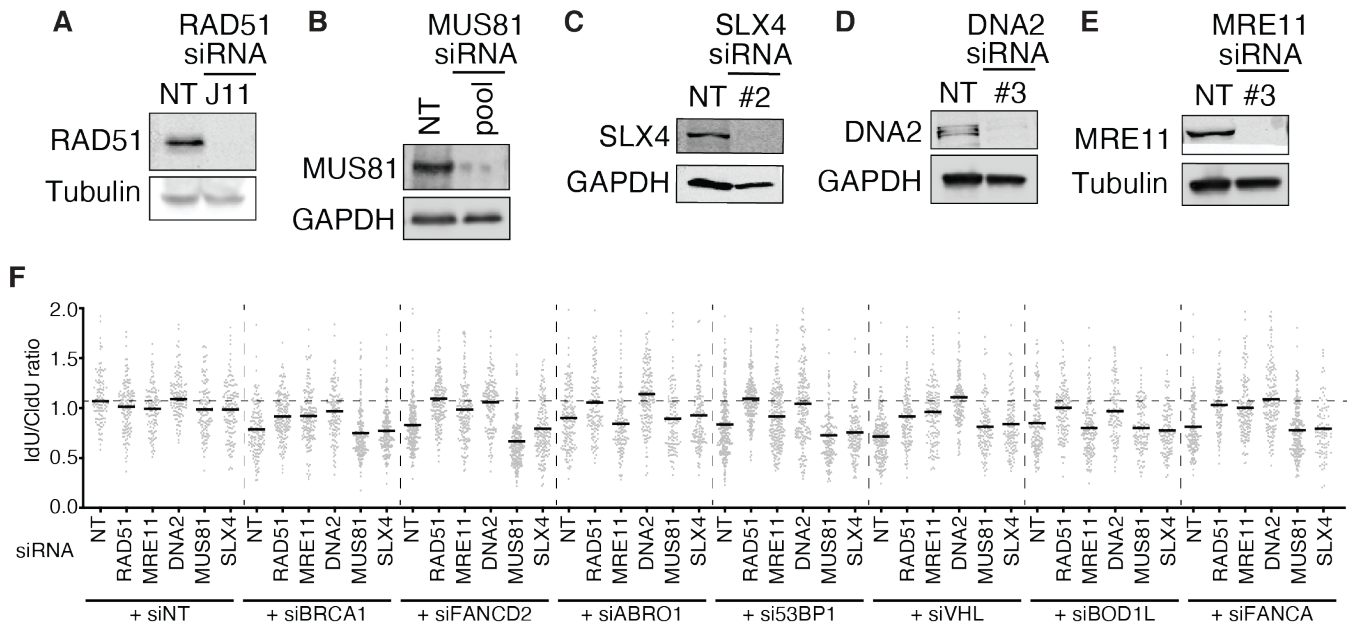

**Fig. S6. Analysis of RAD51, MRE11, DNA2, SLX4, and MUS81 requirements for fork degradation in different genetic backgrounds.** (A-E) Immunoblots were performed after transfection with the indicated siRNAs into U2OS cells to test knockdown efficiency. (F) The indicated siRNAs were transfected into U2OS cells prior to performing the fork protection assay. This is a representative experiment that was completed twice.

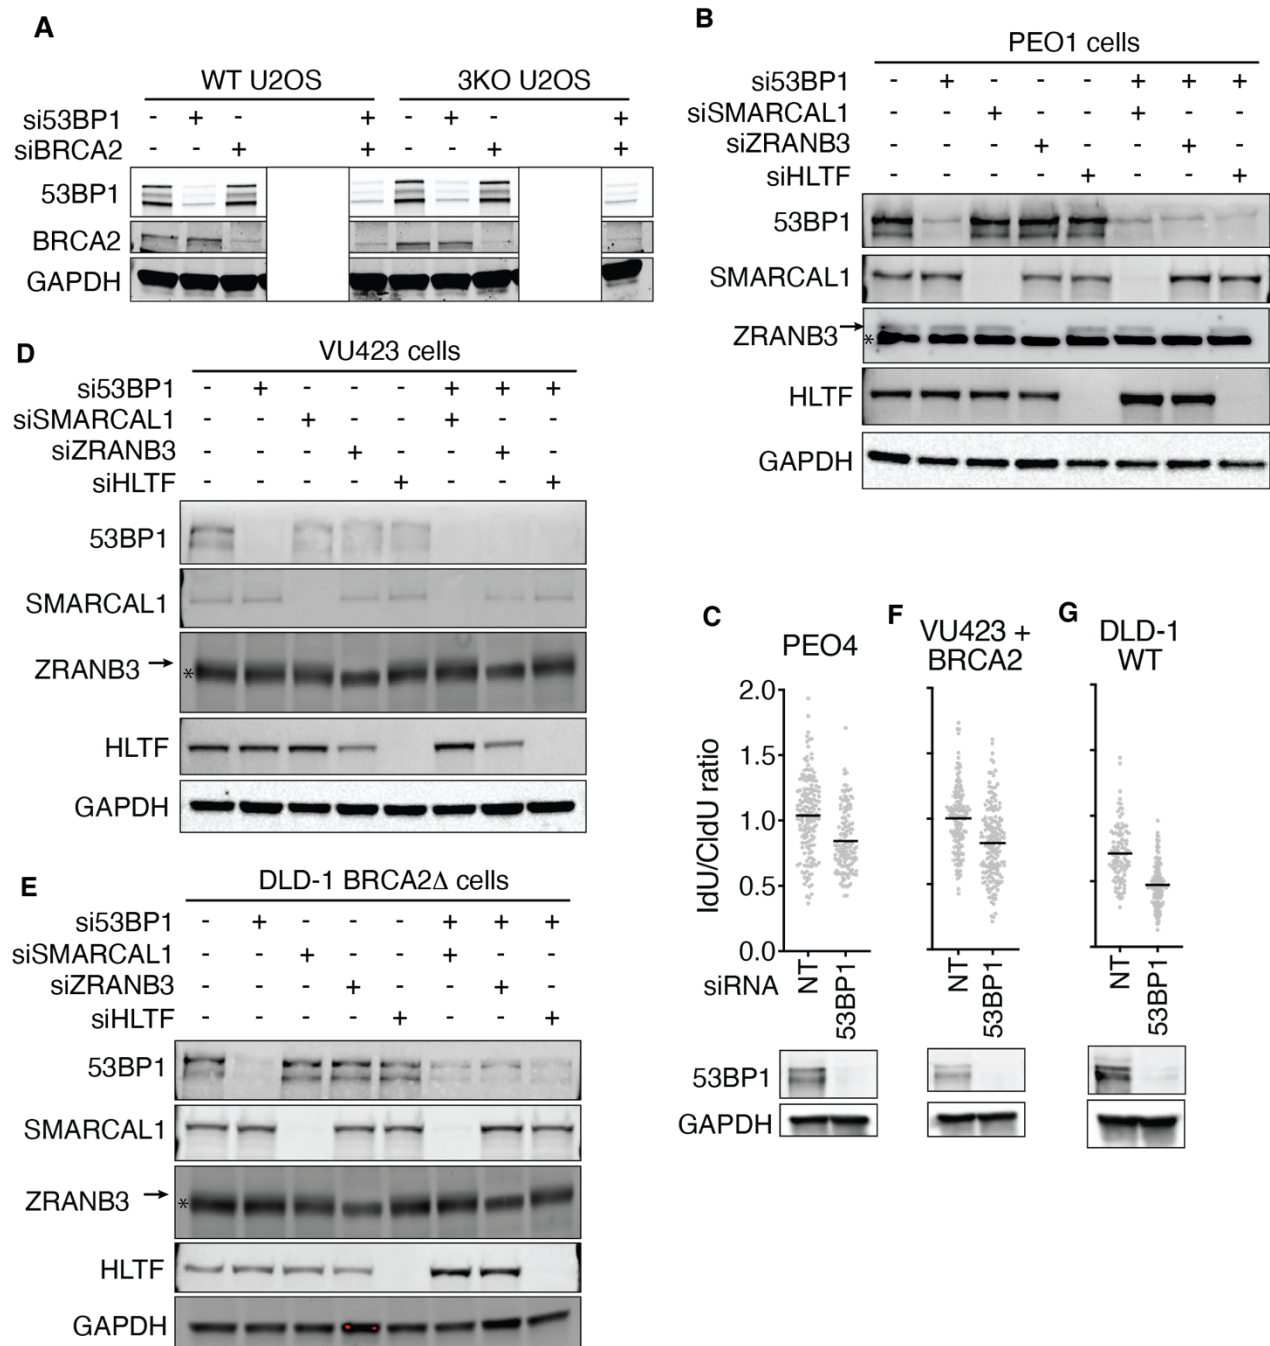

**Fig. S7. Analysis of fork protection in response to 53BP1 inactivation in BRCA2-deficient and proficient cells. (A-B) and (D-E)** Immunoblots examining the knockdown efficiencies. **(C, F, G)** Fork protection assays after 53BP1 knockdown in the indicated cell lines. All the figures represent at least two replicates.



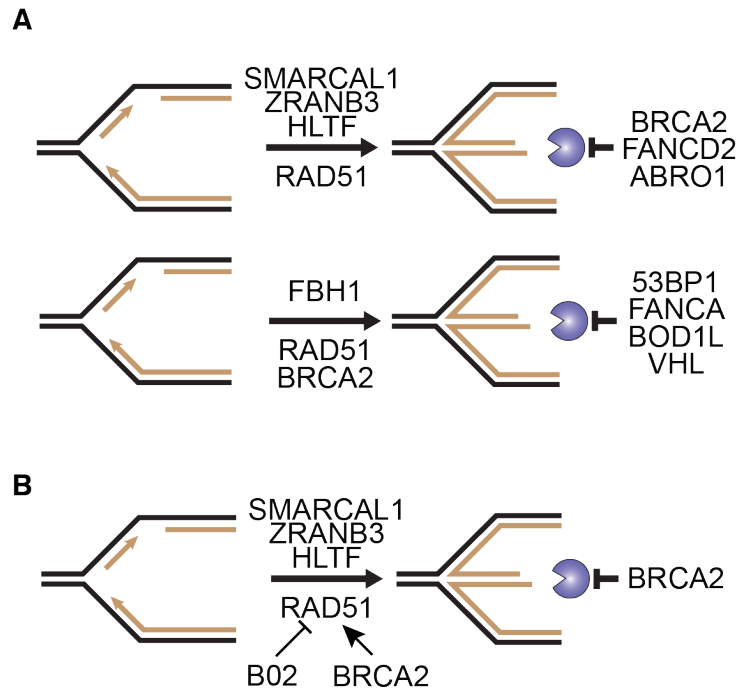

**Fig. S8. Working model. (A)** SMARCAL1, ZRANB3, and HLTf translocases work together with RAD51 to generate reversed forks that are protected by BRCA2, FANCD2 and ABRO1. FBH1 works with RAD51 and BRCA2 to generate a nascent strand degradation substrate that is protected by 53BP1, BOD1L, VHL, and the FA core complex. **(B)** BRCA2 is also required for generating a degradation substrate when RAD51 activity is partially inhibited by the B02 inhibitor.

**Table S1. Description of cell lines generated with CRISPR-Cas9.**

| Cell Type | Gene                           | Clone | Mutation sequence                                                                                                                                                                                                         | sgRNA, exon | Mutation type or reference (same in all alleles unless otherwise indicated) | Figures             |
|-----------|--------------------------------|-------|---------------------------------------------------------------------------------------------------------------------------------------------------------------------------------------------------------------------------|-------------|-----------------------------------------------------------------------------|---------------------|
| U2OS      | 53BP1                          | #6    | TTAGAAGAATCCCACAGGGTCT                                                                                                                                                                                                    | #2, exon 4  | 1bp insertion                                                               | S1B                 |
| U2OS      | 53BP1                          | #18.1 | TTAGAAGAATCCCACAGGGTCT                                                                                                                                                                                                    | #2, exon 4  | 1bp insertion                                                               | S1B                 |
| U2OS      | 53BP1                          | #25   | TTAGAAGAATCCCACAGGGTCT                                                                                                                                                                                                    | #2, exon 4  | 1bp insertion                                                               | S1B                 |
| U2OS      | 53BP1                          | #1    | TTAGAAGAATCCCACAGGGTCT                                                                                                                                                                                                    | #2, exon 4  | 1bp insertion                                                               | 1B                  |
| U2OS      | 53BP1                          | #2    | TTAGAAGAATCGCACAGGGTCT                                                                                                                                                                                                    | #2, exon 4  | 1bp insertion                                                               | 1B                  |
| U2OS      | 53BP1                          | #3    | TTAGAAGAATCCCACAGGGTCT                                                                                                                                                                                                    | #2, exon 4  | 1bp insertion                                                               | 1B-E                |
| U2OS      | 53BP1                          | #7    | TTAGAAGAATC(C/G)CACAGGGTCT                                                                                                                                                                                                | #2, exon 4  | 1bp insertion (one allele is C another allele is G)                         | 1B                  |
| U2OS      | 53BP1                          | #8    | TTAGAAGAATCCCACAGGGTCT                                                                                                                                                                                                    | #2, exon 4  | 1bp insertion                                                               | 1B-E                |
| U2OS      | 53BP1                          | #12   | TTAGAAGAATCCCACAGGGTCT                                                                                                                                                                                                    | #2, exon 4  | 1bp insertion                                                               | 1B-E                |
| U2OS      | 53BP1                          | #15   | TTAGAAGAATCGCACAGGGTCT                                                                                                                                                                                                    | #2, exon 4  | 1bp insertion                                                               | 1B                  |
| U2OS      | 53BP1                          | #18.2 | TTAGAAGAATCCCACAGGGTCT                                                                                                                                                                                                    | #2, exon 4  | 1bp insertion                                                               | 1B                  |
| U2OS      | 53BP1                          | #22   | TTAGAAGAATCCCACAGGGTCT                                                                                                                                                                                                    | #2, exon 4  | 1bp insertion                                                               | 1B-E                |
| U2OS      | 53BP1                          | #79   | N/A                                                                                                                                                                                                                       | N/A         | (38)                                                                        | S1A                 |
| 293T      | 53BP1                          | #14   | ACAGCTGGAGAAGGAACGAGG                                                                                                                                                                                                     | #1, exon 3  | 1bp insertion                                                               | S2B                 |
| 293T      | 53BP1                          | #38   | TTAGAAGAATCCCACAGGGTCT                                                                                                                                                                                                    | #2, exon 4  | 1bp insertion                                                               | S2B                 |
| 293T      | 53BP1                          | #54   | TTAGAAGAATCCCACAGGGTCT                                                                                                                                                                                                    | #2, exon 4  | 1bp insertion                                                               | S2B                 |
| 293T      | 53BP1                          | #57   | AACAGCTGGAGAAGGAACGAGG                                                                                                                                                                                                    | #1, exon 3  | 1bp insertion                                                               | S2B                 |
| RPE1      | 53BP1                          | #4    | TTAGAAGAATCCCACAGGGTCT                                                                                                                                                                                                    | #2, exon 4  | 1bp insertion                                                               | S2E                 |
| RPE1      | 53BP1                          | #8    | TTAGAAGAATCCCACAGGGTCT                                                                                                                                                                                                    | #2, exon 4  | 1bp insertion                                                               | S2E                 |
| RPE1      | 53BP1                          | #14   | TTAGAAGAATCCCACAGGGTCT                                                                                                                                                                                                    | #2, exon 4  | 1bp insertion                                                               | S2E                 |
| RPE1      | 53BP1                          | #15   | TTAGAAGAATCCCACAGGGTCT                                                                                                                                                                                                    | #2, exon 4  | 1bp insertion                                                               | S2E                 |
| RPE1      | 53BP1                          | #31   | TTAGAAGAATCCCACAGGGTCT                                                                                                                                                                                                    | #2, exon 4  | 1bp insertion                                                               | S2E                 |
| RPE1      | 53BP1                          | #54   | TTAGAAGAATCCCACAGGGTCT                                                                                                                                                                                                    | #2, exon 4  | 1bp insertion                                                               | S2E                 |
| RPE1      | 53BP1                          | #62   | CCAGCTGGAGAAGAAACGAGG                                                                                                                                                                                                     | #1, exon 3  | 1bp insertion                                                               | S2E                 |
| U2OS      | FBH1                           | #2    | CAGGAAGCTTGGTCTCTGA                                                                                                                                                                                                       | Exon 4      | 2bp deletion                                                                | 4C                  |
| U2OS      | FBH1 and HLTf                  | #2    | AGGAAGCGTTTGGTCTCTGA                                                                                                                                                                                                      | Exon 4      | FBH1 1bp insertion                                                          | 6E                  |
|           |                                |       | GTTGGGACTACGCTATTACAC                                                                                                                                                                                                     | Exon 2      | HLTF 1bp insertion                                                          |                     |
| U2OS      | HLTF                           | #6    | GGTTGGACTACGCTATTCACGGGA                                                                                                                                                                                                  | Exon 2      | 1bp deletion                                                                | S3A 3C              |
| U2OS      | HLTF                           | #8    | TGGTTGGACTACGCTATTCACGGG                                                                                                                                                                                                  | Exon 2      | 1bp deletion                                                                | 3C S5C              |
| U2OS      | HLTF                           | #19   | TTGGACTACGCTATTCACGGGAGT                                                                                                                                                                                                  | Exon 2      | 1bp deletion                                                                | 3C                  |
| U2OS      | SMARCAL1                       | #13   | GCCCAGATTGCATCAACGCGTGGT                                                                                                                                                                                                  | Exon 9      | 1bp deletion                                                                | S3A 3C S5A          |
| U2OS      | SMARCAL1                       | #26   | TGCATCAACGTTCTGGTGACT                                                                                                                                                                                                     | Exon 9      | 1bp insertion                                                               | 3C                  |
| U2OS      | SMARCAL1                       | #22   | GCCCAGATTGCATCAACGCGTGGT                                                                                                                                                                                                  | Exon 9      | 1bp deletion                                                                | 3C                  |
| U2OS      | ZRANB3                         | #35   | N/A                                                                                                                                                                                                                       | Exon 2      | (14)                                                                        | S3A S5B 3C          |
| U2OS      | ZRANB3                         | #38   | N/A                                                                                                                                                                                                                       | Exon 2      | (14)                                                                        | 3C                  |
| U2OS      | SMARCAL1 ZRANB3 HLTf triple KO | #29   | GACAAGACTAAGAGCAAAG                                                                                                                                                                                                       | Exon 2      | ZRANB3 1bp insertion                                                        | 2B-C 2E S3E 4A-B 3C |
|           |                                |       | TTGCCTGACGACTAAGAGCA                                                                                                                                                                                                      |             | ZRANB3 1bp deletion in another allele                                       |                     |
|           |                                |       | CCACGACGTACGTGGGCCATCACC<br>CAAATCAAGTTTTTGGGGTTCGAGG<br>TGCCGTAAAGCACTAAATCGGAACC<br>CTAAAGGGAGCCCCGATTAGAGC<br>TTGACGGGGAAAGCCGGCGAACGT<br>GGCGAGAAAGGAAGGGAAAGAAAGC<br>GAAAGGAGCGGGCGCTAAGGCGCT<br>GGCAAGTGTAGCGTTGATG | Exon 9      | SMARCAL1 176bp insertion in other alleles                                   |                     |
|           |                                |       | CTCTGAGCCCAGATTGTCGTGGTGA<br>CTGG                                                                                                                                                                                         |             | SMA 8bp deletion                                                            |                     |
|           |                                |       | CTGAGCCCAGATTGCCGTCGTGGTG<br>A                                                                                                                                                                                            |             | SMA 5bp deletion                                                            |                     |
|           |                                |       | GGACTACGCTATCACGGGAGT<br>GTGGTTGGACTATAGTAGATAATTA                                                                                                                                                                        | Exon 2      | HLTF 2bp deletion<br>HLTF 28bp deletion in other alleles                    |                     |
|           |                                |       |                                                                                                                                                                                                                           |             |                                                                             |                     |
| U2OS      | SMARCAL1 ZRANB3 HLTf 3KO       | #84   | GACAAGACTAAGAGCAAAG                                                                                                                                                                                                       | Exon 2      | ZRANB3 1bp insertion                                                        | 3B-C S3E 5C 6A      |
|           |                                |       | CAGATTGCATCAATCGTGGTGACTG                                                                                                                                                                                                 | Exon 9      | SMARCAL1 2bp deletion                                                       |                     |
|           |                                |       | TGGTTGGACTACGCTATTCACGGGAGT                                                                                                                                                                                               | Exon 2      | HLTF 1bp deletion                                                           |                     |

**Table S2. Antibodies, chemicals, siRNAs, and sgRNAs utilized.**

| REAGENT                         |                     | SOURCE                                      | Catalog number                                                          |
|---------------------------------|---------------------|---------------------------------------------|-------------------------------------------------------------------------|
| <b>Antibodies</b>               |                     |                                             |                                                                         |
| Mouse monoclonal anti-BRCA2     |                     | Millipore                                   | OP95                                                                    |
| Mouse monoclonal anti-MUS81     |                     | Abcam                                       | ab14387                                                                 |
| Rabbit polyclonal anti-SMARCAL1 |                     | Custom antibody                             |                                                                         |
| Rabbit polyclonal anti-ZRANB3   |                     | Bethyl                                      | A303-033A                                                               |
| Mouse monoclonal anti-GAPDH     |                     | Millipore                                   | MAB374                                                                  |
| Mouse monoclonal anti-BrdU      |                     | BD Biosciences                              | 347580                                                                  |
| Rat monoclonal anti-BrdU        |                     | Abcam                                       | ab6326                                                                  |
| Goat anti-rat Alexa Fluor 594   |                     | Thermo Fisher                               | A-11007                                                                 |
| Goat anti-mouse Alexa Fluor 488 |                     | Thermo Fisher                               | A-11029                                                                 |
| Rabbit polyclonal anti-53BP1    |                     | Bethyl                                      | A300-272A                                                               |
| Mouse monoclonal anti-tubulin   |                     | Santa Cruz biotechnology                    | sc-5286                                                                 |
| Rabbit polyclonal anti-HLTF     |                     | Abcam                                       | ab183042                                                                |
| Rabbit polyclonal anti-DNA2     |                     | Abcam                                       | ab96488                                                                 |
| Mouse monoclonal anti-MRE11     |                     | GeneTex                                     | GTX70212                                                                |
| Mouse monoclonal anti-BRCA1     |                     | Calbiochem                                  | OP-92                                                                   |
| Mouse monoclonal anti-FANCD2    |                     | Santa Cruz biotechnology                    | sc-20022                                                                |
| Rat monoclonal anti-HA          |                     | Roche                                       | 11867423001                                                             |
| Chicken polyclonal GFP antibody |                     | Abcam                                       | ab13970                                                                 |
| FANCA                           |                     | Bethyl                                      | A301-980A                                                               |
| BOD1L                           |                     | Gift from Grant Stewart                     |                                                                         |
| VHL                             |                     | Cell Signaling technology                   | #68547                                                                  |
| SLX4                            |                     | Bethyl                                      | A302-269A-1                                                             |
| Rabbit polyclonal anti-RAD51    |                     | Abcam                                       | ab133534                                                                |
| <b>Chemicals</b>                |                     |                                             |                                                                         |
| Hydroxyurea                     |                     | Millipore Sigma                             | H8627                                                                   |
| CldU                            |                     | Millipore Sigma                             | C6891                                                                   |
| IdU                             |                     | Millipore Sigma                             | I7125                                                                   |
| Mirin (used at 50 $\mu$ M)      |                     | Millipore Sigma                             | M9948                                                                   |
| Olaparib (AZD2281)              |                     | AstraZeneca                                 |                                                                         |
| B02 inhibitor                   |                     | Calbiochem                                  | 1290541-46-6                                                            |
| Combing assay kit               |                     | Genomic Vision                              |                                                                         |
| <b>siRNA</b>                    | <b>Sequence</b>     | <b>Catalog Number (Dharmacon or Ambion)</b> | <b>Figures</b>                                                          |
| TP53BP1#4                       | GAUAUCAGCUUAGACAAUU | D-003548-04-0002                            | 3A 2A-E 3A-C S3A<br>S3E S4A-B 4A-C<br>S5A-C 5B-C S6F 6A-<br>E S7C S7F-G |
| TP53BP1#6                       | GAGAGCAGAUGAUCCUUUA | J-003548-06-0002                            | 1A                                                                      |
| TP53BP1#7                       | GGACAAGUCUCUCAGCUAU | J-003548-07-0002                            | 1A                                                                      |
| TP53BP1#8                       | GAUAUCAGCUUAGACAAUU | J-003548-08-0002                            | 1A 2A-E 3A-C S2A<br>S2C S3A S3E S4A-C<br>4A-E 5B-C 6A-E S7C<br>S7F-G    |
| TP53BP1#9                       | GGACAGAACCCGCAGAUUU | J-003548-09-0002                            | 1A                                                                      |
| SMARCAL1#6                      | GCUUUGACCUUCUUAGCAA | J-013058-06-0002                            | 2A-B S3B S5I 6B-D                                                       |
| ZRANB3#2                        | GAUUCGAUCUAAUAACAGU | s38488                                      | 2A-B S3C 6B-D                                                           |
| SLX4#2                          | GAAGUGGAAUUGUCUAGCA | s39054                                      | S4B 3C S6C S6F                                                          |

|                               |                           |                                                     |                               |
|-------------------------------|---------------------------|-----------------------------------------------------|-------------------------------|
| MRE11#3                       | GCUAAUGACUCUGAUGAUA       | D-009271-03-0010                                    | 2E 3C S6E-F                   |
| BOD1L#18                      | AGUAGAAGGUUGUGCGAAA       | J-017033-18-0002                                    | S5H                           |
| BOD1L#19                      | GAUAAGAGCAGGAUCUAUA       | J-017033-19-0002                                    | 3A-C 5B-C S5A-C<br>S5H S6F    |
| BOD1L#20                      | GAGUAGAAGACUUGAGCGA       | J-017033-20-0003                                    | S5H                           |
| BOD1L#21                      | UGAUAAAACCGAACGAAAA       | J-017033-21-0003                                    | S5H                           |
| FANCD2#5                      | UGGAUAAGUUGUCGUCUAU       | J-016376-05-0002                                    | 3A-C 5A S5A-C S5E<br>S6F      |
| FANCD2#6                      | CAACAUACCUCGACUCAU        | J-016376-06-0002                                    | 3A-C 5A S5A-C S5E<br>S6F      |
| FANCD2#7                      | GGAUUUACCUGUGAUAAUA       | J-016376-07-0002                                    | 3A-C 5A S5A-C S5E<br>S6F      |
| FANCD2#8                      | GGAGAUUGAUGGUCUACUA       | J-016376-08-0002                                    | 3A-C 5A S5A-C S5E<br>S6F      |
| FANCA#7                       | GGCCAUGCUUUCUGAUUU        | J-019283-07                                         | 3A-C 5B-C S5A-C<br>S5F S6F    |
| FANCA#8                       | GCAGGUCACGGUUGAUGUA       | J-019283-08                                         | 3A-C 5B-C S5A-C<br>S5F S6F    |
| FANCA#9                       | GUAGAAGGUCCACUGUGUA       | J-019283-09                                         | 3A-C 5B-C S5A-C<br>S5F S6F    |
| FANCA#10                      | GUUAGAGUUUGCUCAGUAU       | J-019283-10                                         | 3A-C 5B-C S5A-C<br>S5F S6F    |
| FBH1#5                        | CCUCAACGCUGGUCAAGUA       | J-017404-05-0002                                    | 4A 5A-C                       |
| FBH1#6                        | AGGGAAGGGUGGAUUCAUA       | J-017404-06-0002                                    | 4A 5A-C                       |
| FBH1#7                        | GUGCCUAUUUGGUGUAAGA       | J-017404-07-0002                                    | 4A 5A-C                       |
| FBH1#8                        | AAACAAAACCCUCGUCAUUA      | J-017404-08-0002                                    | 4A 5A-C                       |
| FBH1Non-coding#1              | GUGCCUAUUUGGUGUAAGA       | Custom                                              | 4B                            |
| FBH1Non-coding#2              | GGGAUGUUCUUUUGAUAAA       | Custom                                              | 4B                            |
| DNA2#3                        | ACAGUUGCCUGCAUUCUAA       | Custom                                              | 3E 3C S6D S6F                 |
| RAD51 J11                     |                           | J-003530-11-0002                                    | 2C 3C S6D S6F                 |
| BRCA2 pool                    | Dharmacon SMARTpool       | L-003462-00-0005                                    | 3A-C 5A 5C 6A 6E<br>S5A-D S6F |
| HLTF pool                     | Dharmacon SMARTpool       | L-006448-00-0005                                    | 2A-B 6B-D S3D                 |
| MUS81 pool                    | Dharmacon SMARTpool       | L-016143-01-0005                                    | S4A 3C S6B S6F                |
| VHL pool (pool of #9 and #12) | Dharmacon SMARTpool       | L-003936-00-0005                                    | 3A-C 5B-C S5A-C<br>S5G S6F    |
| ABRO1 pool                    | Dharmacon SMARTpool       | L-016146-01-0005                                    | 3A-C 5A S5A-C S6F             |
| FANCC pool                    | Dharmacon SMARTpool       | L-011033-00-0005                                    | 5D                            |
| FANCG pool                    | Dharmacon SMARTpool       | L-011899-00-0005                                    | 5D                            |
|                               |                           |                                                     |                               |
| <b>sgRNA target</b>           | <b>sgRNA Sequence</b>     | <b>Figures</b>                                      |                               |
| SMARCAL1                      | GCCCAGATTGCATCAACGTCG     | All SMARCAL1 knockouts                              |                               |
| HLTF                          | CACCGGTTGGACTACGCTATTACAC | All HLTF knockouts and<br>HLTF/FBH1 double knockout |                               |
| ZRANB3                        | AGCTTTGCTCTTAGTCTGTC      | All ZRANB3 knockouts                                |                               |
| TP53BP1#1                     | AAACAGCTGGAGAAGAACG       | S1C S2B S2D-E                                       |                               |
| TP53BP1#2                     | TGTGGATTCTTCTAACTTGG      | S1B-C S2B 1B S2D-E                                  |                               |
| FBH1                          | AGCGGTCTTGGTCCTCTG        | All FBH1 knockouts and<br>HLTF/FBH1 double knockout |                               |
